# Supplementary material
Source: PubMed Central journal article supplement (PMC11028818)
Supplement: 262_2016_1949_MOESM1_ESM.pdf [file 262_2016_1949_MOESM1_ESM.pdf]

**Supplementary Table 1.** Primers used for the construction of the vectors in this study.

| Splice site                        | Primer    | Sequence (5'→3') <sup>a</sup>                                                       |
|------------------------------------|-----------|-------------------------------------------------------------------------------------|
| mCherry                            | mCherry-F | 5'- <u>acgct</u> cctagcgtaccggtgccaccatggtgagcaagggcgaggaggataac-3' ( <i>MluI</i> ) |
|                                    | mCherry-R | 5'-caaaattcaaagtctgtttcactccgactgtacagctcgtccatcccgggtg-3'                          |
| F2A                                | F2A-F     | 5'-tccggagtgaacacactttgaattttgaccttctgaagttggcaggagagcttgag-3'                      |
|                                    | F2A-R     | 5'-caaggcgtcactggttaaggccatgggccagggttgactcaactctcctcca-3'                          |
| CD8 $\alpha$ signaling peptide     | SP-F      | 5'-atggccttaccagtaccgccttgctcctccgctggccttctgctccacgccg-3'                          |
|                                    | SP-R      | 5'-cagactccaacagctgcacctccggcctggcggcgtggag-3'                                      |
| anti-ASGR1 dAb(H)                  | dASGR1-F1 | 5'-gaggtgcagctgttgagctggggaggcttggtacagcctgggggtccctgcgtc-3'                        |
|                                    | dASGR1-R1 | 5'-gccatgcatacttctcaaaggtgaatccggaggctgcacaggagagacgcaggggacc-3'                    |
|                                    | dASGR1-F2 | 5'-gaagtatgcgatggcgtgggtccgccaggccccagggaaggctctgagtggtctcac-3'                     |
|                                    | dASGR1-R2 | 5'-cggagtctcgtagtatgtcgtcacaccctcgcgaaatccgtgagaccactccag-3'                        |
| CD8 $\alpha$ hinge*                | dASGR1-F3 | 5'-ctacgcagactccgtgaaggccggttcacctctcccgacaattccaagaacac-3'                         |
|                                    | dASGR1-R3 | 5'-cgggtgctcagcacgcaggctgttcattgcagatacagctgttcttgaattg-3'                          |
|                                    | dASGR1-F4 | 5'-gtgctgaggacaccgcgtatattactgtcgaacataagcggcacgagcatac-3'                          |
|                                    | dASGR1-R4 | 5'-gctcgagacggtgaccagggtccctgaccccaggagtcaaacagatgctcgtgcc-3'                       |
| CD28 TM & endo-domian <sup>b</sup> | CD8-HF    | 5'-gtcaccgtctcagcaccacgacgccagcgcgaccaccaaac-3'                                     |
|                                    | CD8-HR    | 5'-caaccaccaccagcaccacaaaatcacaggcgaagtccagc-3'                                     |
| endo-domian <sup>b</sup>           | CD28-TF   | 5'-tttgggtgctggtggtggtggtggtgagctcctg-3'                                            |
|                                    | BB-endo-R | 5'- <u>gtcgac</u> ctacagtcacatcctcttcttc-3' ( <i>SalI</i> )                         |
| GPC3                               | GPC3-F    | 5'- <u>acgct</u> cctagcgtaccggtgccaccatggccgggaccgtgcgcaccgcg -3' ( <i>MluI</i> )   |
|                                    | GPC3-R    | 5'- <u>gtcgac</u> ctatcagtcaccaggaagaagaagcacaccaccagatggccatg-3' ( <i>SalI</i> )   |
| ASGR1                              | ASGR1-F   | 5'- <u>acgct</u> cctagcgtaccggtgccaccatgaccaaggagtatcaagaccttc-3' ( <i>MluI</i> )   |
|                                    | ASGR1-R   | 5'- <u>gtcgac</u> ctattaaaggagag gtgctcctggctggc-3' ( <i>SalI</i> )                 |

**a.** The underlined nucleotides are restriction sites of the enzymes indicated in the brackets at the ends.

**b.** The PCR template is the previously constructed vector  $\alpha$ GPC3-28BBZ CAR [1].

**Supplementary Figure 1.**

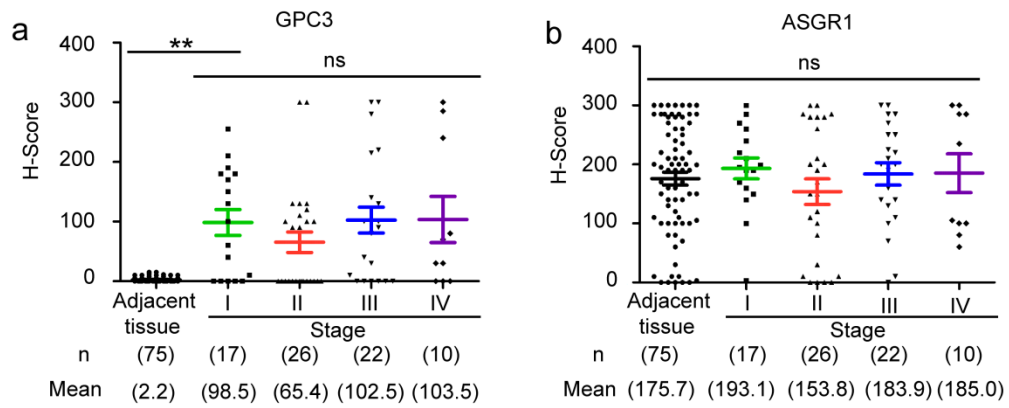

**The H-score of GPC3 and ASGR1 staining in scatter plots.** The scattering of H-scores for GPC3 and ASGR1 expression in hepatocellular carcinoma (HCC) and adjacent normal liver is illustrated in scatter plots. The mean and standard errors are indicated. **a** The overexpression of GPC3 was detected in tumor samples, and there was no differential expression among the HCC samples at different stages. **b** The H-scores [2] for ASGR1 of each category were not significantly different.

## Supplementary Figure 2.

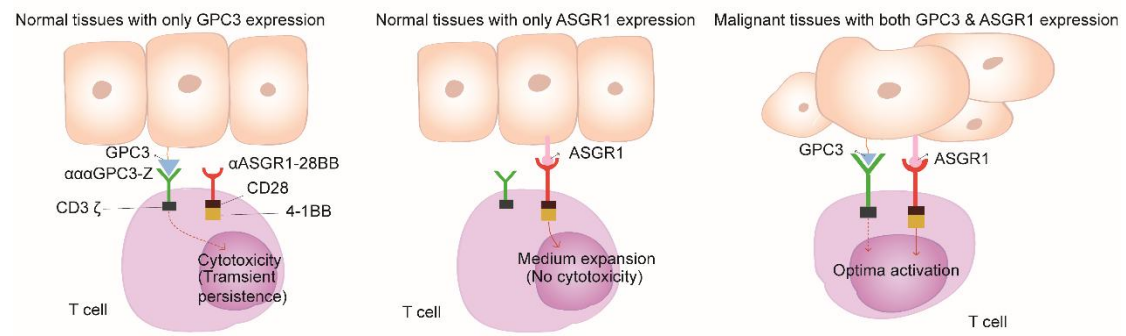

**A schematic diagram depicting the mechanism of dual-targeted T cell activation.** This dual-targeted strategy mimics the natural activation process of T cells. T cells only completely activate when they recognize GPC3 and ASGR1 simultaneously. If either GPC3 or ASGR1 is absent, as occurs in normal tissue, the T cells will not undergo optimal activation.

**Supplementary Figure 3.**

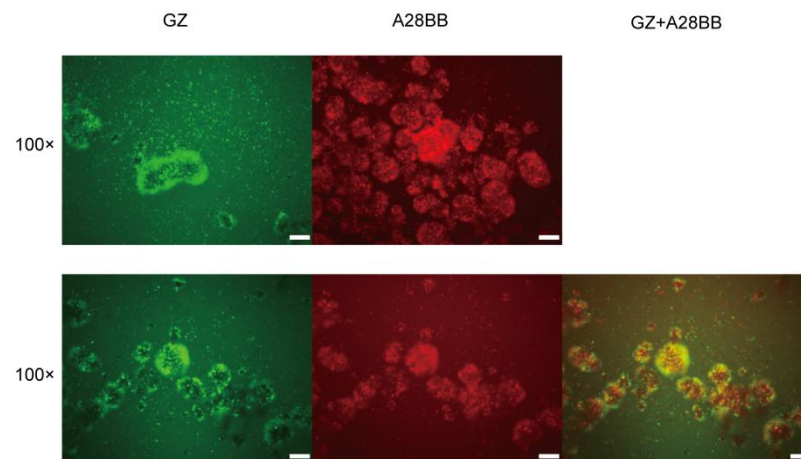

**T cells were effectively transduced with the  $\alpha$ ASGR1-28BB- or/and  $\alpha$ GPC3-Z-encoding vectors.**

Representative green fluorescence (eGFP) and red fluorescence (mCherry) photomicrographs (scale bar, 50  $\mu$ m) of GZ, A28BB and GZ+A28BB T cells after gene transfer.

#### Supplementary Figure 4.

$\alpha$ K562-64/86

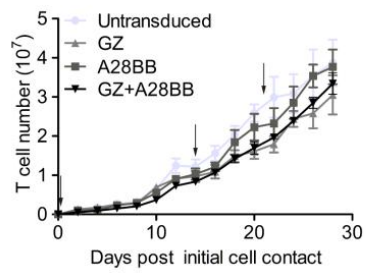

**The *in vitro* expansion of T cells after re-stimulation with irradiated  $\alpha$ K562-64/86.** On day 14, at the end of one cycle of activation, T cells were then re-stimulated by irradiated  $\alpha$ K562-64/86 cells. The arrows indicate re-stimulation of T cells using freshly irradiated  $\alpha$ K562-64/86 cells every week.

### Supplementary Figure 5.

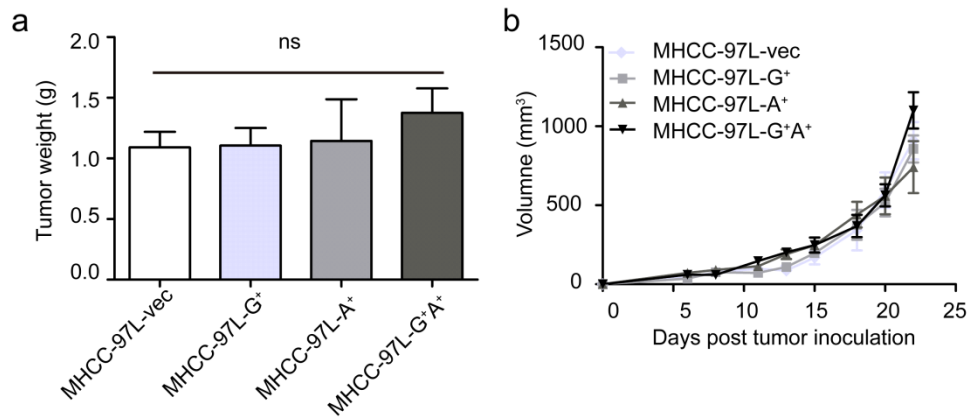

The *in vivo* growth of MHCC-97L cells was not significantly affected by the introduction of GPC3 and/or ASGR1.  $2 \times 10^6$  MHCC-97L-vec, MHCC-97L-G<sup>+</sup>, MHCC-97L-A<sup>+</sup>, or MHCC-97L-G<sup>+</sup>A<sup>+</sup> cells were injected subcutaneously into the right flank of NOD/SCID mice (n=5). **a** The tumor weight of xenografts treated with saline. The adoptively transferred human T cells in subsequent animal experiments were re-suspended in saline. **b** Growth curve of the vector- and gene-transduced MHCC-97L cells (P> 0.05).

## References

1. Gao H, Li K, Tu H, Pan X, Jiang H, Shi B, Kong J, Wang H, Yang S, Gu J, Li Z (2014) Development of T cells redirected to glypican-3 for the treatment of hepatocellular carcinoma. *Clin Cancer Res* 20 (24):6418-6428. doi:10.1158/1078-0432.CCR-14-1170
2. Shi B, Abrams M, Sepp-Lorenzino L (2013) Expression of asialoglycoprotein receptor 1 in human hepatocellular carcinoma. *J Histochem Cytochem* 61 (12):901-909. doi:10.1369/0022155413503662
